# Supplementary material
Source: PubMed Central journal article supplement (PMC7072001)
Supplement: NIHMS1549667-supplement-1.pdf [file NIHMS1549667-supplement-1.pdf]

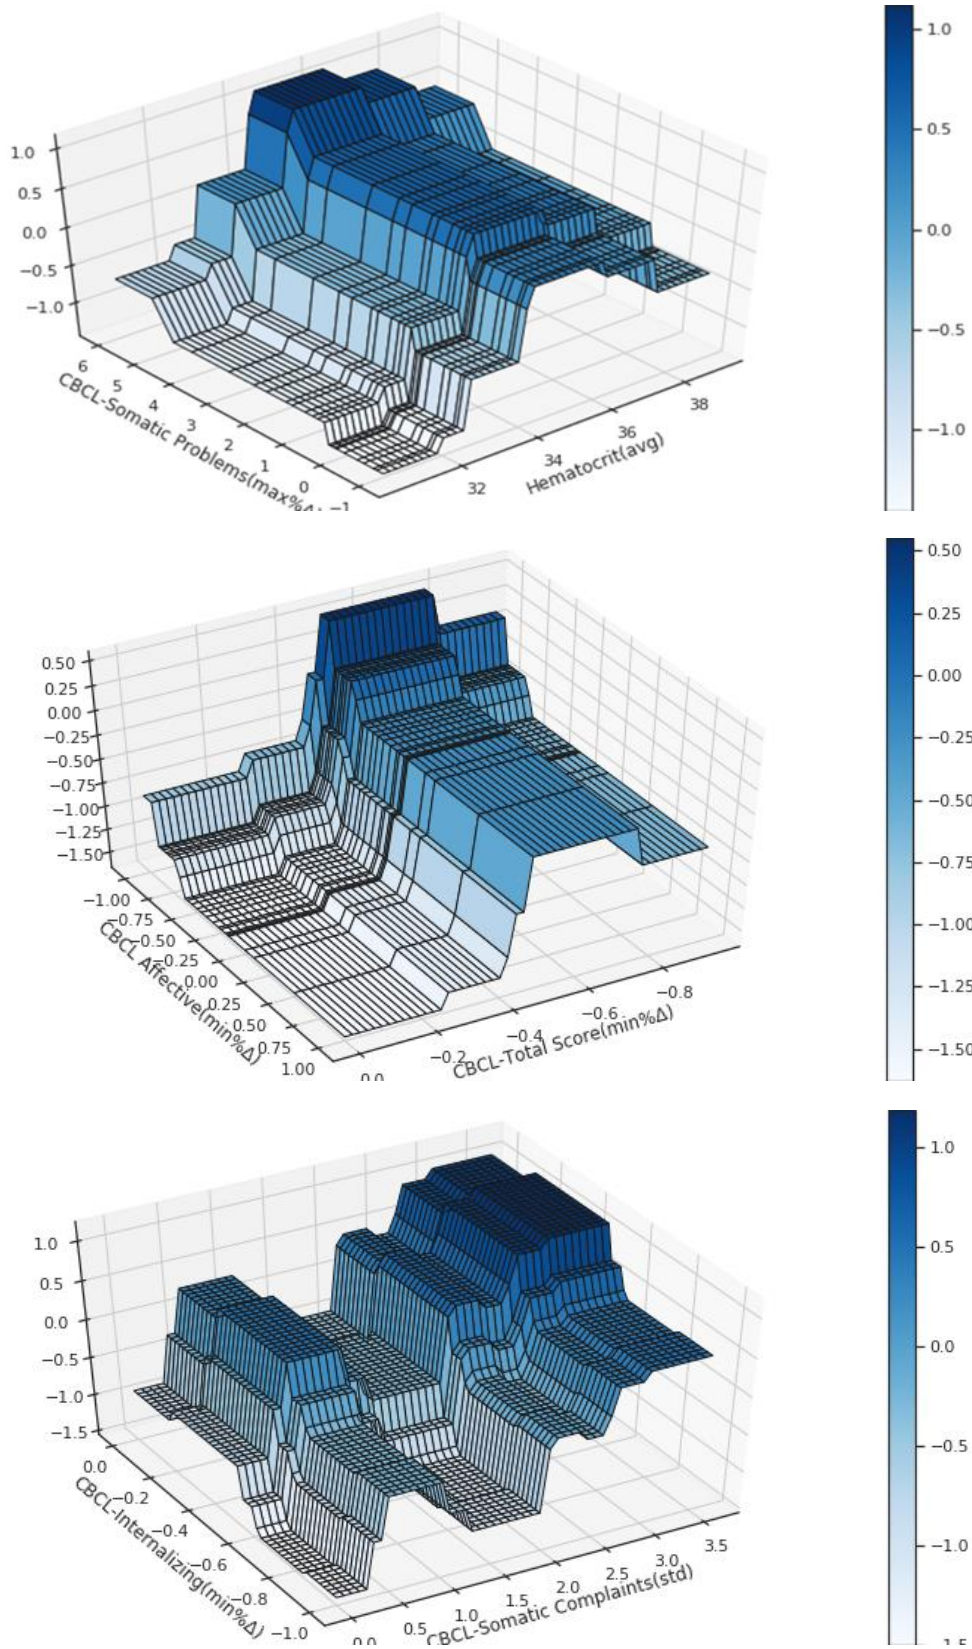

**Supplemental Figure 1.** 3-D graphs of the 2-way interactions from the longitudinal GBM

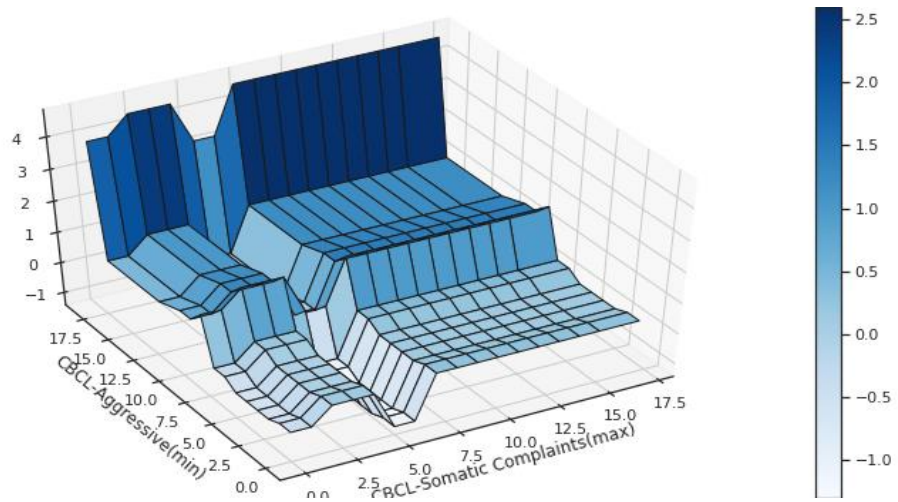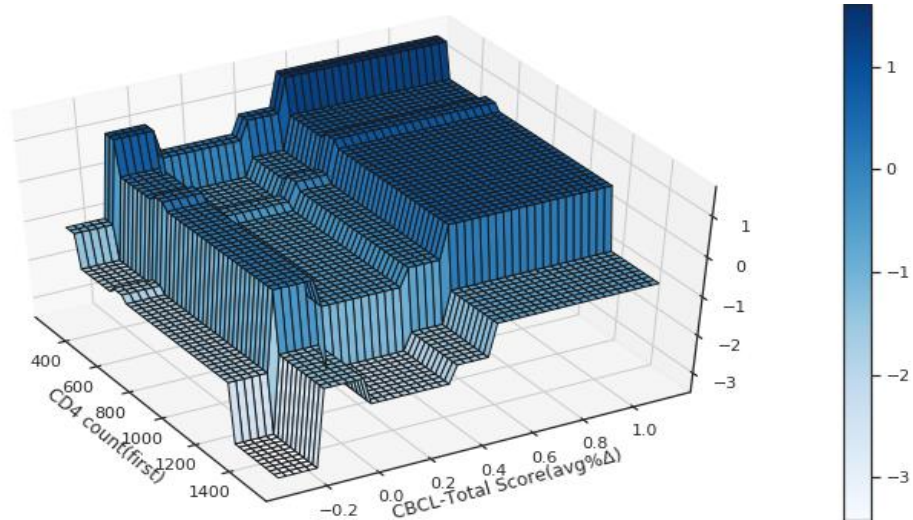

**Supplemental Figure 2.** 3-D graphs of the 2-way interactions from the interactive GBM.
